# Supplementary material for: Chondrocytes from Osteoarthritis Patients Adopt Distinct Phenotypes in Response to Central TH1/TH2/TH17 Cytokines
Source: MDPI journal article supplement (doi:10.3390/ijms22179463), 2021-08-31
Supplement: s1 [file s1]

**Table S1:** Twenty most strongly upregulated genes in interleukin 4 -treated OA chondrocytes (IL4) relative to control (Co).

| Gene    | Name                                                                   | Function                                     | Mean (Co) | Mean (IL4) | Fold Change | adj. p                  |
|---------|------------------------------------------------------------------------|----------------------------------------------|-----------|------------|-------------|-------------------------|
| KCNK3   | Potassium two pore domain channel subfamily K member 3                 | Potassium ion transport                      | 4.2       | 41.0       | 12.97       | <1.0 × 10 <sup>-4</sup> |
| FGL2    | Fibrinogen like 2                                                      | Negative regulation of antigen presentation? | 26.8      | 361.2      | 10.00       | <1.0 × 10 <sup>-4</sup> |
| SOCS1   | Suppressor of cytokine signaling 1                                     | Regulation of inflammation                   | 4.4       | 37.0       | 8.99        | <1.0 × 10 <sup>-4</sup> |
| MAOA    | Monoamine oxidase A                                                    | Dopamine catabolism                          | 17.8      | 157.1      | 8.56        | <1.0 × 10 <sup>-4</sup> |
| CSN1S1  | Casein alpha s1                                                        | Steroid signaling?                           | 6.8       | 20.8       | 6.16        | 2.5 × 10 <sup>-4</sup>  |
| LRRC32  | Leucine rich repeat containing 32                                      | TGFβ signaling                               | 6.2       | 36.5       | 5.43        | 5.30 × 10 <sup>-5</sup> |
| FAM19A1 | Family with sequence similarity 19 member A1, C-C motif chemokine like | Neuroblast differentiation?                  | 4.0       | 17.5       | 5.04        | 0.0059                  |
| OTOGL   | Otogelin like                                                          | ?                                            | 3.8       | 17.5       | 4.86        | 3.2 × 10 <sup>-4</sup>  |
| SUCNR1  | Succinate receptor 1                                                   | Metabolism and inflammation                  | 3.6       | 15.1       | 4.65        | 0.0018                  |
| ANPEP   | Alanyl aminopeptidase, membrane                                        | Cell adhesion and inflammation               | 88.3      | 408.8      | 4.41        | <1.0 × 10 <sup>-4</sup> |
| CADPS   | Calcium dependent secretion activator                                  | Exocytosis                                   | 4.1       | 11.3       | 4.16        | 0.047                   |
| SH2D1B  | SH2 domain containing 1B                                               | Regulation of inflammation                   | 7.3       | 27.7       | 4.12        | 2.90 × 10 <sup>-5</sup> |
| CISH    | Cytokine inducible SH2 containing protein                              | Regulation of cell growth and inflammation   | 16.0      | 64.6       | 4.08        | 2.3 × 10 <sup>-4</sup>  |
| SELP    | Selectin P                                                             | Cell adhesion and inflammation               | 202.7     | 849.8      | 4.00        | <1.0 × 10 <sup>-4</sup> |
| SAMD3   | Sterile alpha motif domain containing 3                                | ?                                            | 4.3       | 17.3       | 3.95        | 0.0066                  |
| CAPN8   | Calpain 8                                                              | ?                                            | 3.0       | 10.9       | 3.85        | 0.011                   |
| LPL     | Lipoprotein lipase                                                     | Lipid metabolism and inflammation            | 15.1      | 44.1       | 3.65        | 1.0 × 10 <sup>-5</sup>  |
| CYTIP   | Cytohesin 1 interacting protein                                        | Cell adhesion                                | 8.9       | 33.8       | 3.61        | 4.80 × 10 <sup>-5</sup> |
| RASL11B | RAS like family 11 member B                                            | TGFβ signaling                               | 4.6       | 17.9       | 3.44        | 0.018                   |
| MT-TW   | Mitochondrially encoded trna tryptophan                                | ?                                            | 24.7      | 60.6       | 3.38        | 2.3 × 10 <sup>-4</sup>  |

**Table S2:** Genes downregulated with FC < -1.5 in interleukin 4 -treated OA chondrocytes (IL4) relative to control (Co)

| Gene            | Name                                       | Function                                             | Mean (Co) | Mean (IL4) | Fold Change | adj. p                 |
|-----------------|--------------------------------------------|------------------------------------------------------|-----------|------------|-------------|------------------------|
| <i>OSR1</i>     | Odd-skipped related transcription factor 1 | Regulation of cell proliferation                     | 50.2      | 28.6       | -1.95       | 0.016                  |
| <i>ANGPTL7</i>  | Angiopoietin like 7                        | Regulation of angiogenesis                           | 572.7     | 403.0      | -1.72       | 0.019                  |
| <i>SCG5</i>     | Secretogranin V                            | Regulation of protein aggregation                    | 164.7     | 109.6      | -1.59       | 0.035                  |
| <i>OLFML2B</i>  | Olfactomedin like 2B                       | ?                                                    | 84.9      | 50.7       | -1.56       | 0.025                  |
| <i>NEK2</i>     | NIMA related kinase 2                      | Regulation of cell proliferation                     | 420.4     | 295.1      | -1.55       | 2.1 × 10 <sup>-4</sup> |
| <i>HIST1H4L</i> | Histone cluster 1 H4 family member l       | ?                                                    | 178.3     | 136.3      | -1.54       | 0.026                  |
| <i>NDC80</i>    | NDC80, kinetochore complex component       | Cell division                                        | 821.8     | 578.4      | -1.53       | 5.0 × 10 <sup>-6</sup> |
| <i>RORC</i>     | RAR related orphan receptor C              | Regulation of cell differentiation and inflammation? | 148.9     | 105.2      | -1.52       | 0.027                  |
| <i>AURKB</i>    | Aurora kinase B                            | Regulation of cell proliferation                     | 164.0     | 114.5      | -1.52       | 0.0044                 |
| <i>HMMR-AS1</i> | HMMR antisense RNA 1                       | Regulation of cell motility?                         | 248.4     | 173.2      | -1.50       | 5.4 × 10 <sup>-4</sup> |

**Table S3: GO terms enriched among the genes significantly affected by IL-4.** The list of genes with FC > 1.5 in either direction and with FDR-corrected p-value < 0.05 was analyzed with DAVID, and the resulting list of GO terms was reduced with REVIGO.

| Term                                                   | adj. p                 |
|--------------------------------------------------------|------------------------|
| Cell division                                          | $2.45 \times 10^{-11}$ |
| Chromosome segregation                                 | $9.74 \times 10^{-8}$  |
| Microtubule-based movement                             | $6.36 \times 10^{-6}$  |
| CENP-A containing nucleosome assembly                  | 0.00035                |
| Protein localization to kinetochore                    | 0.00099                |
| Regulation of gene silencing                           | 0.0014                 |
| Metaphase plate congression                            | 0.0018                 |
| Protein heterotetramerization                          | 0.0027                 |
| G2/M transition of mitotic cell cycle                  | 0.0029                 |
| Telomere organization                                  | 0.0030                 |
| DNA replication-dependent nucleosome assembly          | 0.0064                 |
| Positive regulation of cytokinesis                     | 0.012                  |
| Positive regulation of gene expression, epigenetic     | 0.017                  |
| Blood coagulation                                      | 0.023                  |
| DNA replication                                        | 0.026                  |
| Anaphase-promoting complex-dependent catabolic process | 0.049                  |
| Cell proliferation                                     | 0.049                  |

**Table S4:** Genes markedly (FC > 2.5) upregulated in degraded OA cartilage compared to preserved in Almeida et al. [35] and significantly affected by proinflammatory cytokines in our study.

| Gene             | Name                                              | FC<br>(Almeida) | FDR<br>(Almeida)       | FC<br>(IL1 $\beta$ ) | adj. p<br>(IL1 $\beta$ ) | FC<br>(IL17) | adj. p<br>(IL17) | FC<br>(IFN $\gamma$ ) | adj. p<br>(IFN $\gamma$ ) |
|------------------|---------------------------------------------------|-----------------|------------------------|----------------------|--------------------------|--------------|------------------|-----------------------|---------------------------|
| <i>IL11</i>      | Interleukin 11                                    | 22.8            | $1.53 \times 10^{-20}$ | 7.63                 | <0.0001                  | 3.31         | 0.00043          | -                     | -                         |
| <i>IGFBP1</i>    | Insulin like growth factor binding protein 1      | 7.59            | $1.32 \times 10^{-9}$  | 3.65                 | <0.0001                  | 3.06         | <0.0001          | 1.47                  | <0.0001                   |
| <i>TNP1</i>      | Transition protein 1                              | 6.6             | $2.60 \times 10^{-5}$  | 15.70                | <0.0001                  | 5.23         | 0.00019          | -                     | -                         |
| <i>ISM2</i>      | Isthmin 2                                         | 5.24            | $4.71 \times 10^{-18}$ | -                    | -                        | -            | -                | 3.90                  | <0.0001                   |
| <i>RIPK4</i>     | Receptor interacting serine/threonine kinase 4    | 5.22            | $5.45 \times 10^{-13}$ | 5.13                 | <0.0001                  | 2.12         | 0.00076          | -                     | -                         |
| <i>KPNA7</i>     | Karyopherin subunit alpha 7                       | 5.1             | $7.56 \times 10^{-6}$  | 4.99                 | <0.0001                  | -            | -                | 2.42                  | 0.0052                    |
| <i>LIF</i>       | LIF, interleukin 6 family cytokine                | 4.91            | $7.79 \times 10^{-10}$ | 30.92                | <0.0001                  | 12.51        | <0.0001          | 1.59                  | <0.0001                   |
| <i>NGF</i>       | Nerve growth factor                               | 4.91            | $2.53 \times 10^{-14}$ | 4.86                 | <0.0001                  | -            | -                | 1.37                  | 0.00027                   |
| <i>TFPI2</i>     | Tissue factor pathway inhibitor 2                 | 4.08            | $9.92 \times 10^{-9}$  | 26.93                | <0.0001                  | 2.41         | <0.0001          | 1.27                  | 0.0086                    |
| <i>LAMC2</i>     | Laminin subunit gamma 2                           | 3.75            | $2.05 \times 10^{-6}$  | 9.63                 | <0.0001                  | -            | -                | -                     | -                         |
| <i>CLIC3</i>     | Chloride intracellular channel 3                  | 3.65            | $1.81 \times 10^{-11}$ | -3.23                | 0.00029                  | -            | -                | 2.15                  | <0.0001                   |
| <i>TNFAIP6</i>   | TNF alpha induced protein 6                       | 3.58            | $2.48 \times 10^{-8}$  | 36.87                | <0.0001                  | 4.59         | <0.0001          | 3.59                  | <0.0001                   |
| <i>ERFE</i>      | Erythroferrone                                    | 3.44            | $8.82 \times 10^{-12}$ | -3.36                | <0.0001                  | 1.41         | 0.004            | -1.62                 | <0.0001                   |
| <i>PAPPA</i>     | Pappalysin 1                                      | 3.43            | $1.14 \times 10^{-10}$ | 6.46                 | <0.0001                  | 1.39         | 0.00015          | 1.57                  | <0.0001                   |
| <i>DNER</i>      | Delta/notch like EGF repeat containing            | 3.37            | $4.24 \times 10^{-11}$ | 4.49                 | <0.0001                  | 2.66         | <0.0001          | -                     | -                         |
| <i>CCL20</i>     | C-C motif chemokine ligand 20                     | 3.35            | $5.10 \times 10^{-5}$  | 1128.35              | <0.0001                  | 73.49        | <0.0001          | -                     | -                         |
| <i>HMGA2</i>     | High mobility group AT-hook 2                     | 3.22            | $3.85 \times 10^{-7}$  | 8.04                 | <0.0001                  | 5.34         | <0.0001          | 1.51                  | 0.0018                    |
| <i>BMPR1B</i>    | Bone morphogenetic protein receptor type 1B       | 3.2             | $1.28 \times 10^{-7}$  | 6.94                 | <0.0001                  | 2.09         | 0.0049           | -                     | -                         |
| <i>LAMB3</i>     | Laminin subunit beta 3                            | 3.11            | $7.66 \times 10^{-13}$ | 20.72                | <0.0001                  | 3.42         | <0.0001          | -                     | -                         |
| <i>PTGES</i>     | Prostaglandin E synthase                          | 3.06            | $3.61 \times 10^{-12}$ | 5.72                 | <0.0001                  | 4.27         | <0.0001          | 2.04                  | <0.0001                   |
| <i>KRT16</i>     | Keratin 16                                        | 3.03            | $1.22 \times 10^{-5}$  | 36.58                | <0.0001                  | -            | -                | -                     | -                         |
| <i>TNFRSF11B</i> | TNF receptor superfamily member 11b               | 3.01            | $7.12 \times 10^{-12}$ | 2.74                 | <0.0001                  | 3.12         | <0.0001          | -1.25                 | 0.00021                   |
| <i>SOX11</i>     | SRY-box 11                                        | 2.99            | $1.62 \times 10^{-8}$  | 3.64                 | <0.0001                  | -            | -                | -1.52                 | 0.017                     |
| <i>DNAJC12</i>   | Dnaj heat shock protein family (Hsp40) member C12 | 2.97            | $5.10 \times 10^{-5}$  | -                    | -                        | 3.33         | 0.044            | -                     | -                         |
| <i>KRT17</i>     | Keratin 17                                        | 2.96            | $4.08 \times 10^{-5}$  | 18.39                | <0.0001                  | -            | -                | 5.21                  | <0.0001                   |
| <i>TRIM36</i>    | Tripartite motif containing 36                    | 2.85            | $1.08 \times 10^{-8}$  | 7.06                 | <0.0001                  | -            | -                | -                     | -                         |
| <i>USP43</i>     | Ubiquitin specific peptidase 43                   | 2.77            | 0.00014                | 3.94                 | 0.02                     | 3.41         | 0.013            | 4.50                  | 0.0091                    |
| <i>GPR158</i>    | G protein-coupled receptor 158                    | 2.73            | 0.0036                 | 9.98                 | $2.50 \times 10^{-5}$    | 6.77         | 0.0018           | 5.55                  | 0.00076                   |
| <i>SHISA9</i>    | Shisa family member 9                             | 2.73            | $4.47 \times 10^{-5}$  | -                    | -                        | -            | -                | -2.72                 | $2.90 \times 10^{-5}$     |
| <i>NTF3</i>      | Neurotrophin 3                                    | 2.72            | $6.59 \times 10^{-6}$  | 2.98                 | 0.00053                  | -            | -                | -                     | -                         |
| <i>FAM167A</i>   | Family with sequence similarity 167 member A      | 2.67            | $1.91 \times 10^{-7}$  | 3.54                 | <0.0001                  | 2.09         | 0.035            | -                     | -                         |
| <i>TREM1</i>     | Triggering receptor expressed on myeloid cells 1  | 2.66            | $7.77 \times 10^{-5}$  | 12.14                | <0.0001                  | 2.47         | <0.0001          | -1.68                 | $6.70 \times 10^{-5}$     |
| <i>IGFBP3</i>    | Insulin like growth factor binding protein 3      | 2.65            | $1.12 \times 10^{-7}$  | 2.87                 | <0.0001                  | 1.89         | <0.0001          | -1.16                 | 0.001                     |
| <i>SLC27A2</i>   | Solute carrier family 27 member 2                 | 2.64            | $7.84 \times 10^{-5}$  | -2.59                | 0.024                    | -            | -                | -2.52                 | 0.0073                    |
| <i>ANK3</i>      | Ankyrin 3                                         | 2.62            | $6.02 \times 10^{-10}$ | -6.74                | <0.0001                  | -3.02        | <0.0001          | -1.91                 | <0.0001                   |

|                        |                                             |             |                       |              |                       |             |         |              |              |
|------------------------|---------------------------------------------|-------------|-----------------------|--------------|-----------------------|-------------|---------|--------------|--------------|
| <i>DAW1</i>            | Dynein assembly factor<br>with WD repeats 1 | <b>2.57</b> | $2.55 \times 10^{-5}$ | <b>2.96</b>  | $8.00 \times 10^{-6}$ | <b>2.44</b> | <0.0001 | <b>-1.76</b> | <b>0.022</b> |
| <i>ANXA8</i>           | Annexin A8                                  | <b>2.56</b> | $4.84 \times 10^{-6}$ | <b>31.85</b> | $4.20 \times 10^{-5}$ | -           | -       | -            | -            |
| <i>KLHL30-<br/>AS1</i> | Kelch like family member<br>30              | <b>2.5</b>  | 0.0037                | -            | -                     | <b>4.31</b> | 0.0067  | -            | -            |

Red = upregulated genes

Blue = downregulated genes

**Table S5:** Genes markedly (FC < -2.5) downregulated in degraded OA cartilage compared to preserved in Almeida et al. [35] and significantly affected by proinflammatory cytokines in our study.

| Gene             | Name                                  | FC<br>(Almeida) | FDR<br>(Almeida)       | FC<br>(IL1 $\beta$ ) | adj. p<br>(IL1 $\beta$ ) | FC<br>(IL17) | adj. p<br>(IL17) | FC<br>(IFN $\gamma$ ) | adj. p<br>(IFN $\gamma$ ) |
|------------------|---------------------------------------|-----------------|------------------------|----------------------|--------------------------|--------------|------------------|-----------------------|---------------------------|
| <i>RCAN2</i>     | Regulator of calcineurin 2            | -4.08           | $9.19 \times 10^{-12}$ | -16.58               | <0.0001                  | -4.74        | <0.0001          | -1.46                 | 0.00015                   |
| <i>VIT</i>       | Vitrin                                | -3.91           | $1.14 \times 10^{-8}$  | -2.96                | <0.0001                  | -1.44        | 0.0008           | -1.95                 | <0.0001                   |
| <i>C3</i>        | Complement C3                         | -3.83           | $4.00 \times 10^{-7}$  | 67.78                | <0.0001                  | 33.70        | <0.0001          | -                     | -                         |
| <i>SHISA3</i>    | Shisa family member 3                 | -3.67           | $3.14 \times 10^{-8}$  | -10.46               | <0.0001                  | -2.11        | <0.0001          | -1.35                 | $5.1 \times 10^{-5}$      |
| <i>RSPO3</i>     | R-spondin 3                           | -3.62           | $1.48 \times 10^{-6}$  | 47.37                | <0.0001                  | 4.42         | <0.0001          | 2.08                  | <0.0001                   |
| <i>PTGER3</i>    | Prostaglandin E receptor 3            | -3.08           | $4.91 \times 10^{-8}$  | -2.69                | <0.0001                  | -3.03        | <0.0001          | -2.82                 | <0.0001                   |
| <i>MATN4</i>     | Matrilin 4                            | -3.04           | 0.0028                 | -2.59                | 0.022                    | -            | -                | -                     | -                         |
| <i>GDF10</i>     | Growth differentiation factor 10      | -2.86           | $1.05 \times 10^{-8}$  | -20.57               | <0.0001                  | -2.93        | <0.0001          | -1.70                 | <0.0001                   |
| <i>GDF7</i>      | Growth differentiation factor 7       | -2.81           | $1.91 \times 10^{-6}$  | -2.60                | 0.0001                   | -            | -                | -                     | -                         |
| <i>NCMAP</i>     | Non-compact myelin associated protein | -2.80           | 0.0012                 | -                    | -                        | 4.08         | <0.0001          | -                     | -                         |
|                  | Cysteine rich secretory protein       |                 |                        |                      |                          |              |                  |                       |                           |
| <i>CRISPLD1</i>  | LCCL domain containing 1              | -2.76           | $9.29 \times 10^{-6}$  | -5.00                | <0.0001                  | -3.39        | <0.0001          | -                     | -                         |
| <i>KIF1A</i>     | Kinesin family member 1A              | -2.70           | $8.64 \times 10^{-8}$  | 4.59                 | 0.00042                  | -            | -                | -                     | -                         |
|                  | Dishevelled binding antagonist        |                 |                        |                      |                          |              |                  |                       |                           |
| <i>DACT1</i>     | of beta catenin 1                     | -2.68           | $2.85 \times 10^{-7}$  | -4.13                | <0.0001                  | -            | -                | 1.26                  | 0.0079                    |
|                  | Gremlin 1, DAN family BMP             |                 |                        |                      |                          |              |                  |                       |                           |
| <i>GREM1</i>     | antagonist                            | -2.65           | $2.57 \times 10^{-5}$  | -8.76                | <0.0001                  | -3.41        | <0.0001          | -                     | -                         |
| <i>ZFHX4-AS1</i> | ZFHX4 antisense RNA 1                 | -2.65           | 0.021                  | -6.04                | 0.0001                   | -2.77        | 0.012            | -                     | -                         |
|                  | KIT proto-oncogene receptor           |                 |                        |                      |                          |              |                  |                       |                           |
| <i>KIT</i>       | tyrosine kinase                       | -2.58           | 0.00052                | 3.50                 | 0.0072                   | -            | -                | -                     | -                         |
| <i>ERICH3</i>    | Glutamate rich 3                      | -2.56           | 0.023                  | -5.62                | <0.0001                  | -            | -                | -2.64                 | 0.0012                    |
| <i>PRLR</i>      | Prolactin receptor                    | -2.55           | 0.019                  | 9.93                 | <0.0001                  | 3.05         | 0.0034           | 3.92                  | $8.3 \times 10^{-5}$      |
| <i>STEAP4</i>    | STEAP4 metalloductase                 | -2.53           | $4.95 \times 10^{-9}$  | -3.52                | <0.0001                  | -            | -                | -1.79                 | <0.0001                   |

Red = upregulated genes

Blue = downregulated genes

**Table S6:** Genes markedly differentially expressed in degraded and preserved OA cartilage (with FC > 1.5 in either direction) in Almeida et al. [35] and markedly affected (with FC > 1.5 in either direction) by IL-4 in our study.

| Gene                                                                                                       | Name                                             | FC<br>(Almeida) | adj. p<br>(Almeida)    | FC (our<br>study) | adj. p (our<br>study) |
|------------------------------------------------------------------------------------------------------------|--------------------------------------------------|-----------------|------------------------|-------------------|-----------------------|
| <i>Genes upregulated in degraded cartilage (Almeida et al. [35]) and upregulated by IL-4 (our study)</i>   |                                                  |                 |                        |                   |                       |
| <i>PTPRZ1</i>                                                                                              | Protein tyrosine phosphatase, receptor type Z1   | <b>1.94</b>     | 0.019                  | <b>2.62</b>       | 0.0074                |
| <i>TMEM200A</i>                                                                                            | Transmembrane protein 200A                       | <b>1.87</b>     | 0.0014                 | <b>2.58</b>       | <0.0001               |
| <i>POSTN</i>                                                                                               | Periostin                                        | <b>2.06</b>     | 0.032                  | <b>2.32</b>       | <0.0001               |
| <i>TENM3</i>                                                                                               | Teneurin transmembrane protein 3                 | <b>1.90</b>     | $4.08 \times 10^{-5}$  | <b>2.08</b>       | $1.40 \times 10^{-5}$ |
| <i>TTC9</i>                                                                                                | Tetratricopeptide repeat domain 9                | <b>2.38</b>     | $2.30 \times 10^{-7}$  | <b>2.07</b>       | $1.00 \times 10^{-6}$ |
| <i>DUSP5</i>                                                                                               | Dual specificity phosphatase 5                   | <b>1.51</b>     | 0.031                  | <b>1.97</b>       | 0.0011                |
| <i>ANGPTL4</i>                                                                                             | Angiopoietin like 4                              | <b>1.91</b>     | $8.50 \times 10^{-6}$  | <b>1.67</b>       | $8.00 \times 10^{-6}$ |
| <i>LRRC8C</i>                                                                                              | Leucine rich repeat containing 8 family member C | <b>2.36</b>     | $5.88 \times 10^{-8}$  | <b>1.65</b>       | 0.00029               |
| <i>F5</i>                                                                                                  | Coagulation factor V                             | <b>1.68</b>     | 0.00084                | <b>1.50</b>       | 0.04                  |
| <i>COL7A1</i>                                                                                              | Collagen type VII alpha 1 chain                  | <b>2.37</b>     | $1.96 \times 10^{-8}$  | <b>1.50</b>       | 0.0019                |
| <i>Genes upregulated in degraded cartilage (Almeida et al. [35]) and downregulated by IL-4 (our study)</i> |                                                  |                 |                        |                   |                       |
| <i>HMMR</i>                                                                                                | HMMR antisense RNA 1                             | <b>1.78</b>     | 0.047                  | <b>-1.50</b>      | 0.00054               |
| <i>Genes downregulated in degraded cartilage (Almeida et al. [35]) and upregulated by IL-4 (our study)</i> |                                                  |                 |                        |                   |                       |
| <i>FGL2</i>                                                                                                | Fibrinogen like 2                                | <b>-1.71</b>    | 0.0093                 | <b>10.00</b>      | <0.0001               |
| <i>CISH</i>                                                                                                | Cytokine inducible SH2 containing protein        | <b>-2.24</b>    | $4.71 \times 10^{-18}$ | <b>4.08</b>       | 0.00023               |
| <i>GPM6A</i>                                                                                               | Glycoprotein M6A                                 | <b>-1.73</b>    | 0.015                  | <b>2.25</b>       | 0.044                 |
| <i>COL14A1</i>                                                                                             | Collagen type XIV alpha 1 chain                  | <b>-1.75</b>    | 0.033                  | <b>2.11</b>       | <0.0001               |
| <i>CYSLTR1</i>                                                                                             | Cysteinyl leukotriene receptor 1                 | <b>-1.68</b>    | 0.00085                | <b>1.96</b>       | 0.00072               |
| <i>DKK1</i>                                                                                                | Dickkopf WNT signaling pathway inhibitor 1       | <b>-1.66</b>    | 0.018                  | <b>1.86</b>       | 0.028                 |
| <i>CORO2B</i>                                                                                              | Coronin 2B                                       | <b>-1.82</b>    | 0.0001                 | <b>1.60</b>       | 0.014                 |

Red = upregulated genes

Blue = downregulated genes

**Table S7: Expression of central cytokine receptors in unstimulated chondrocytes.** Mean expression values are given as DESeq2-normalized counts.

| Gene   | Mean (Co) |
|--------|-----------|
| IL1R1  | 2448.7    |
| IL4R   | 65.6      |
| IL17RB | 210.5     |
| IL17RC | 349.1     |
| IL17RD | 66.1      |
| IL17RE | 14.3      |
| IFNGR1 | 1529.5    |
| IFNGR2 | 1501.3    |
